# Supplementary material for: Monitoring adsorption-induced switching by 129Xe NMR spectroscopy in a new metal–organic framework Ni2(2,6-ndc)2(dabco)
Source: Royal Society of Chemistry journal article supplement (doi:10.1039/c003835k), 2010-01-01
Supplement: c003835k.pdf [file c003835k.pdf]

## Supporting Information

### Monitoring Adsorption-Induced Switching by $^{129}\text{Xe}$ NMR Spectroscopy in a new Metal-Organic Framework

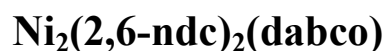

Nicole Klein,<sup>a</sup> Christin Herzog,<sup>b</sup> Michal Sabo,<sup>c</sup> Irena Senkowska,<sup>a</sup> Jürgen Getzschmann,<sup>a</sup>  
Silvia Paasch,<sup>b</sup> Martin R. Lohe,<sup>a</sup> Eike Brunner,<sup>b\*</sup> and Stefan Kaskel<sup>a\*</sup>

<sup>a</sup> *Institute of Inorganic Chemistry, Dresden University of Technology, Mommsenstr. 6, D-01069 Dresden, Germany, Fax: +49 351 46337287; Tel: +49 351 46334885; E-mail: Stefan.Kaskel@chemie.tu-dresden.de*

<sup>b</sup> *Bioanalytical Chemistry, Dresden University of Technology, Bergstr. 66, D-01069 Dresden, Germany Fax: +49 351 46337188; Tel: +49 351 46332631; E-mail: Eike.Brunner@chemie.tu-dresden.de*

<sup>c</sup> *Mayser GmbH & Co. KG, Bismarckstr. 2, D-88161 Lindenberg, Germany, Fax: +49 8381 507101; Tel: +49 8381 507268; E-mail: Michal.Sabo@mayser.de*

### *Thermogravimetric analysis*

The thermogravimetric analysis was carried out using a Netzsch STA 409 PC Luxx thermal analyser with heating in air. An as synthesised sample ( $\text{Ni}_2(2,6\text{-ndc})_2(\text{dabco})(\text{DMF})_{6.5}(\text{MeOH})_3$ , **1**) was dried in argon flow and heated at a constant rate 5 °C /min in air from 30 °C to 600 °C.

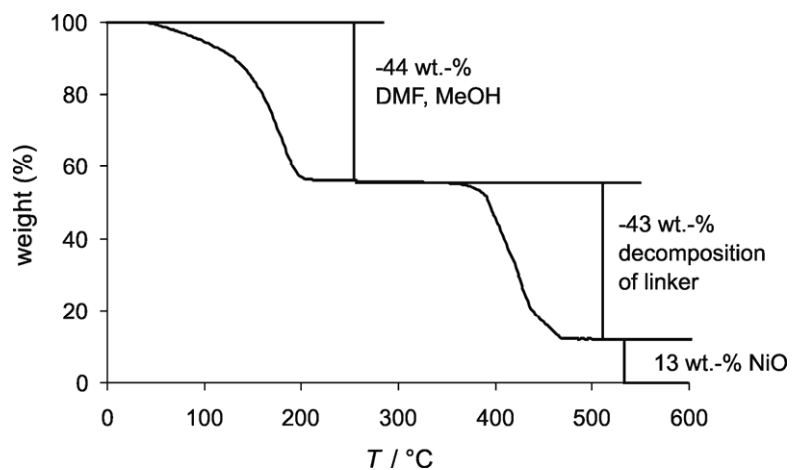

**Fig. 1:** TGA of phase 1 in air.

### FT-IR-Spectra

The FT-IR-Spectra are measured in air with a Magna-IR 550 series II spectrometer from Nicolet. A small amount of the sample was mixed with KBr in a ratio of 1:100 in a ball mill and afterwards formed to a tablet that was measured right away.

The characteristic valence vibrations bands of the bridging carboxylate groups  $\nu_s$  (COO) and  $\nu_{as}$  (COO) are the same for phase **1** and the activated sample ( $\text{Ni}_2(2,6\text{-ndc})_2(\text{dabco})$ , **2**) ( $1608\text{ cm}^{-1}$ ,  $1410\text{ cm}^{-1}$ ). The band at  $1670\text{ cm}^{-1}$  in the spectrum of **1** indicates the CHO-vibration of the solvent molecule DMF. This signal is missing for the solvent free phase **2**.

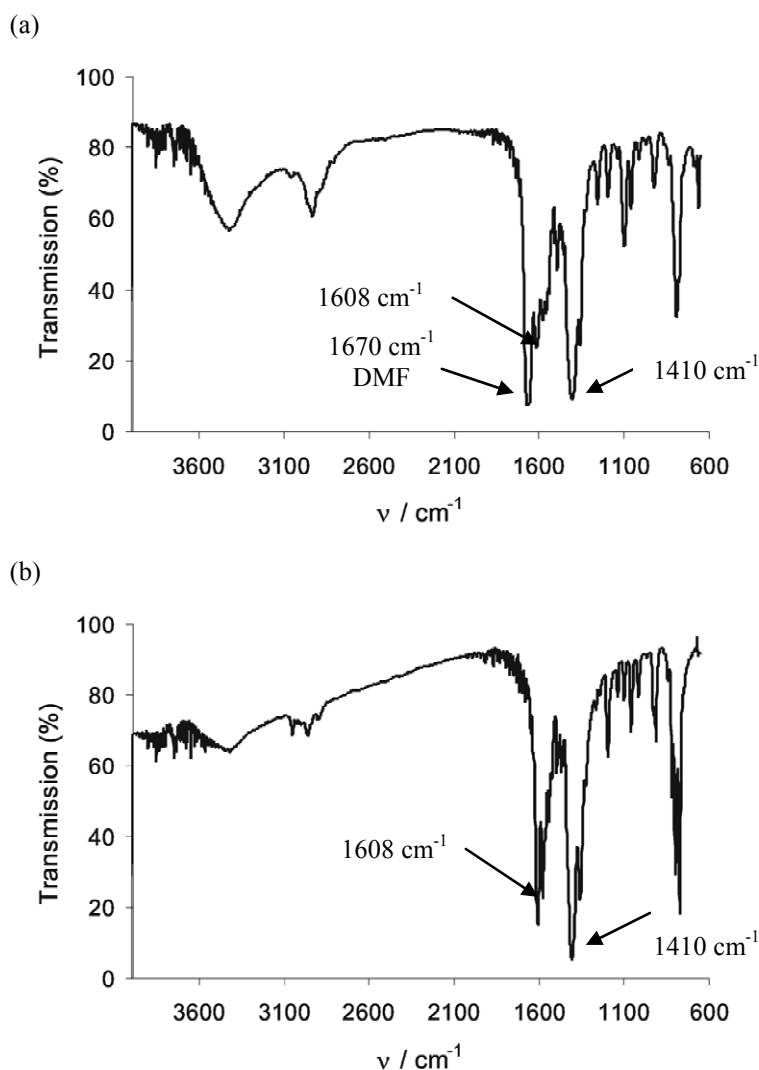

**Fig. 2:** IR-spectra of **1** (a) and **2** (b).

### *The colour change during adsorption of N<sub>2</sub>*

For the experiment with nitrogen an activated sample **2** (yellow) was filled in a typical Quantachrome adsorption measurement cell, evacuated and cooled down to 273K. At the given temperature the sample cell was filled with nitrogen up to 1 bar. In the following the sample cell was cooled down to 77K which leads to a relative pressure whereas the opening of the structure is almost completed. At this point the sample appears green again.

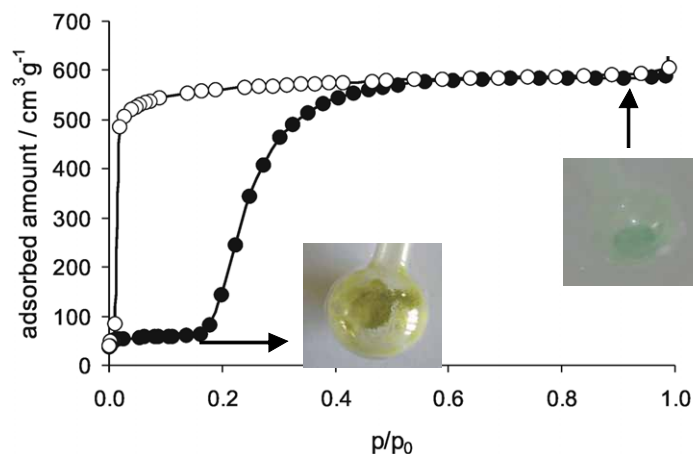

**Fig. 3:** N<sub>2</sub> adsorption/desorption (●/○) isotherm of Ni<sub>2</sub>(2,6-ndc)<sub>2</sub>(dabco) measured at 77K and the colour change occurring during the adsorption.

### ***Hydrogen adsorption at 77K***

Low pressure hydrogen adsorption measurement up to 1 bar at 77K was carried out using a Quantachrome Autosorb1C apparatus. The high pressure adsorption measurement up to 110 bar at 77K was performed using approximately 0.55 g sample on a volumetric BELSORP-HP apparatus.

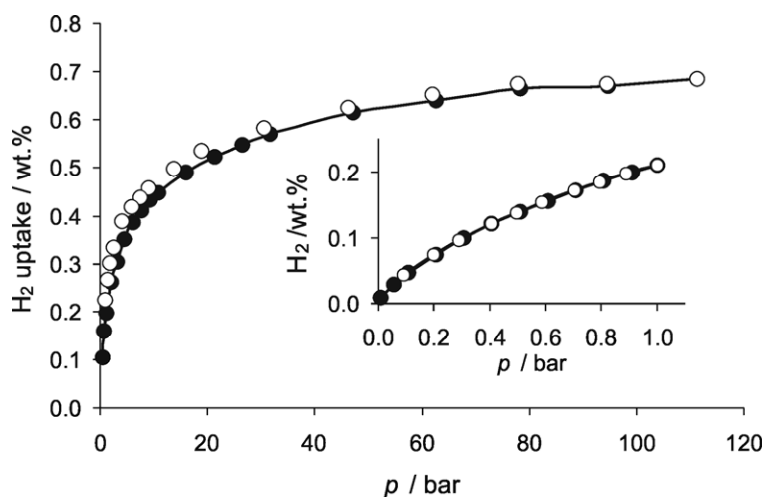

**Fig. 4:** High pressure H<sub>2</sub> excess adsorption/desorption (●/○) isotherm at 77K; insertion: low pressure H<sub>2</sub> adsorption/desorption isotherm of Ni<sub>2</sub>(2,6-ndc)<sub>2</sub>(dabco) at 77K.
